# Supplementary material
Source: PubMed Central journal article supplement (PMC9036549)
Supplement: NIHMS1799433-supplement-1.pdf [file NIHMS1799433-supplement-1.pdf]

**eTable.** Selected Clinical Trials of DA-R-EPOCH in DLBCL

| Clinical Trial                                                                 | Study Design                                                                                                              | Patient Population                                                                                         | Outcomes                                                                                                                                                                                                        | Conclusions                                                                                                                                                                                                      |
|--------------------------------------------------------------------------------|---------------------------------------------------------------------------------------------------------------------------|------------------------------------------------------------------------------------------------------------|-----------------------------------------------------------------------------------------------------------------------------------------------------------------------------------------------------------------|------------------------------------------------------------------------------------------------------------------------------------------------------------------------------------------------------------------|
| <b>High-Grade B-Cell Lymphoma With Double-Hit Lymphoma/Triple-Hit Lymphoma</b> |                                                                                                                           |                                                                                                            |                                                                                                                                                                                                                 |                                                                                                                                                                                                                  |
| Dunleavy, 2018 <sup>53</sup>                                                   | Phase 2 single-arm study of DA-R-EPOCH in DLBCL with <i>MYC</i> rearrangement                                             | 53 patients aged >18 y with untreated DLBCL and <i>MYC</i> rearrangement by FISH                           | In the entire cohort, the 4-y OS rate was 77%. In the 45% of patients with DHL, the 4-y OS rate was 82%, and the 4-y OS rate was 72% in the patients who had DHL with a high IPI of 3-5.                        | DA-R-EPOCH was effective, achieving durable remissions in patients with <i>MYC</i> -rearranged DLBCL, including those with DHL and a high-risk IPI score.                                                        |
| <b>Primary Mediastinal B-Cell Lymphoma</b>                                     |                                                                                                                           |                                                                                                            |                                                                                                                                                                                                                 |                                                                                                                                                                                                                  |
| Dunleavy, 2013 <sup>54</sup>                                                   | Phase 2 single-arm study of DA-R-EPOCH without radiation in PMBL                                                          | 51 patients with untreated PMBL                                                                            | 5-y EFS was 93%, and 5-y OS was 97%.                                                                                                                                                                            | DA-R-EPOCH was efficacious in PMBL, without any need for consolidative radiation.                                                                                                                                |
| <b>HIV-Associated DLBCL</b>                                                    |                                                                                                                           |                                                                                                            |                                                                                                                                                                                                                 |                                                                                                                                                                                                                  |
| Sparano, 2010 <sup>55</sup>                                                    | Phase 2 randomized trial of EPOCH with either concurrent or sequential rituximab in HIV-associated lymphomas              | 106 patients aged >18 y with untreated HIV-associated lymphomas, including DLBCL                           | 2-y OS rates were 70% with concurrent DA-R-EPOCH and 67% with sequential EPOCH and rituximab; 70%-75% of surviving patients in the entire cohort were without evidence of progressive lymphoma at 2 y.          | DA-R-EPOCH was effective for HIV-associated lymphoma; patients who had a baseline CD4 cell count of less than 50/ $\mu$ L had a high infectious death rate in the concurrent DA-R-EPOCH arm.                     |
| <b>Gray Zone Lymphoma</b>                                                      |                                                                                                                           |                                                                                                            |                                                                                                                                                                                                                 |                                                                                                                                                                                                                  |
| Wilson, 2014 <sup>56</sup>                                                     | Single-arm study of DA-R-EPOCH in GZL                                                                                     | 24 patients with untreated mediastinal GZL                                                                 | 3-y EFS rate was 62%, and 3-y OS rate was 74%.                                                                                                                                                                  | DA-R-EPOCH has efficacy in mediastinal GZL without the use of mediastinal radiation.                                                                                                                             |
| <b>High-Risk International Prognostic Index Scores</b>                         |                                                                                                                           |                                                                                                            |                                                                                                                                                                                                                 |                                                                                                                                                                                                                  |
| Wilson, 2002 <sup>26</sup>                                                     | Single-arm study of DA-R-EPOCH in all comers with DLBCL                                                                   | 38 patients with untreated or relapsed/refractory DLBCL                                                    | Untreated patients had an ORR of 85% and a 1-y OS of 79%.                                                                                                                                                       | Rituximab in addition to EPOCH was efficacious in patients with untreated DLBCL in a study with a significant number of high-risk patients; 61% of untreated patients had at least high-intermediate IPI scores. |
| Wilson, 2008 <sup>57</sup>                                                     | Phase 2 single-arm study of influence of biomarkers and GCB vs non-GCB cell of origin subtype on outcomes with DA-R-EPOCH | 72 patients aged >18 y with untreated stage II-IV DLBCL                                                    | 5-y PFS was 79%, 5-y OS was 80%. Survival was significantly worse in high-risk IPI.                                                                                                                             | DA-R-EPOCH had efficacy in low- and intermediate-IPI DLBCL.                                                                                                                                                      |
| Purroy, 2015 <sup>58</sup>                                                     | Phase 2, single-arm study of DA-R-EPOCH in poor-prognosis DLBCL                                                           | 81 patients aged 18-75 y with untreated DLBCL and IPI >2, age-adjusted IPI >1, or any IPI if bulky disease | 10-y EFS was 48% and 10-y OS was 64%, with no significant difference in survival based on IPI or GCB vs ABC subtype. 46% of patients had neutropenic fever, and 91% completed all planned cycles of DA-R-EPOCH. | DA-R-EPOCH demonstrated good long-term outcomes in high-risk DLBCL, with 86% of patients in the study having a high-risk IPI of 3-5.                                                                             |

(Table continues on next page)

**eTable.** (Continued) Selected Clinical Trials of DA-R-EPOCH in DLBCL

| Clinical Trial                                                     | Study Design                                                                                                              | Patient Population                                                                                                                                                        | Outcomes                                                                                                                                                        | Conclusions                                                                                                                                                                                                                                                                                                                                                                  |
|--------------------------------------------------------------------|---------------------------------------------------------------------------------------------------------------------------|---------------------------------------------------------------------------------------------------------------------------------------------------------------------------|-----------------------------------------------------------------------------------------------------------------------------------------------------------------|------------------------------------------------------------------------------------------------------------------------------------------------------------------------------------------------------------------------------------------------------------------------------------------------------------------------------------------------------------------------------|
| <b>High-Risk International Prognostic Index Scores (continued)</b> |                                                                                                                           |                                                                                                                                                                           |                                                                                                                                                                 |                                                                                                                                                                                                                                                                                                                                                                              |
| Bartlett, 2019 <sup>59</sup>                                       | Phase 3 randomized controlled trial of DA-R-EPOCH vs R-CHOP                                                               | 491 patients aged >18 y with untreated stage II-IV DLBCL; fresh frozen tumor biopsy required before registration for assessment of double-hit and double-expressor status | Response rates and survival did not differ significantly between the R-CHOP and DA-R-EPOCH cohorts, with 5-y OS rates of 79% for R-CHOP and 78% for DA-R-EPOCH. | Negative: DA-R-EPOCH was more toxic and did not improve PFS or OS compared with R-CHOP. Post hoc subgroup analyses revealed a significantly longer PFS in the DA-R-EPOCH group for IPI 3-5, although no significant difference in OS.                                                                                                                                        |
| <b>Activated B-Cell Subtype</b>                                    |                                                                                                                           |                                                                                                                                                                           |                                                                                                                                                                 |                                                                                                                                                                                                                                                                                                                                                                              |
| Wilson, 2008 <sup>57</sup>                                         | Phase 2 single-arm study of influence of biomarkers and GCB vs non-GCB cell of origin subtype on outcomes with DA-R-EPOCH | 72 patients aged >18 y with untreated stage II-IV DLBCL                                                                                                                   | 5-y PFS was 79% and 5-y OS was 80%, and PFS was better in GCB compared with non-GCB subtype.                                                                    | DA-R-EPOCH possibly has better activity in the GCB subtype of DLBCL.                                                                                                                                                                                                                                                                                                         |
| Wilson, 2012 <sup>60</sup>                                         | Phase 2 single-arm study of influence of GCB vs non-GCB cell of origin subtype with DA-R-EPOCH                            | 69 patients aged >18 y with untreated stage II-IV DLBCL                                                                                                                   | 51% of patients had non-GCB/ABC subtype, and TTP, EFS, and OS were all significantly worse in non-GCB vs GCB.                                                   | DA-R-EPOCH had better activity in GCB than in non-GCB DLBCL.                                                                                                                                                                                                                                                                                                                 |
| <b>Double-Expressor Lymphoma</b>                                   |                                                                                                                           |                                                                                                                                                                           |                                                                                                                                                                 |                                                                                                                                                                                                                                                                                                                                                                              |
| Bartlett, 2019 <sup>59</sup>                                       | Phase 3 randomized controlled trial of DA-R-EPOCH vs R-CHOP                                                               | 491 patients aged >18 y with untreated stage II-IV DLBCL; fresh frozen tumor biopsy required before registration for assessment of double-hit and double-expressor status | Response rates and survival did not differ significantly between the R-CHOP or DA-R-EPOCH cohorts.                                                              | <b>Negative:</b> No subgroup survival differences were found between R-CHOP and DA-R-EPOCH, including no difference in patients with DEL. More favorable results for R-CHOP vs historical controls, as well as the small percentage (only 16%) of patients with DEL and the small number (only 3) of patients with DHL, suggest selection bias and lack of generalizability. |

ABC, activated B-cell; DA-R-EPOCH, dose-adjusted rituximab, etoposide, prednisone, vincristine, cyclophosphamide, and doxorubicin; DEL, double-expressor lymphoma; DHL, double-hit lymphoma; DLBCL, diffuse large B-cell lymphoma; EFS, event-free survival; FISH, fluorescence in situ hybridization; GCB, germinal center B-cell; GZL, gray zone lymphoma; IPI, International Prognostic Index; ORR, overall response rate; OS, overall survival; PFS, progression-free survival; PMBL, primary mediastinal B-cell lymphoma; R-CHOP, rituximab plus cyclophosphamide, doxorubicin, vincristine, and prednisone; THL, triple-hit lymphoma; TTP, time to progression; y, year(s).
